# Supplementary material for: Estimating the costs for the treatment of abortion complications in two public referral hospitals: a cross-sectional study in Ouagadougou, Burkina Faso
Source: Springer Nature journal article supplement (doi:10.1186/s12913-016-1822-7), 2016-10-07
Supplement: MOESM1 [file 12913_2016_1822_MOESM1_ESM.pdf]

## COST OF ABORTIONS

### **Drugs, materials and consumables used in treating abortion complications (Unofficial translation)**

This questionnaire comprise 6 parts :

Part A : Patients suffering from incomplete abortion

Part B : Patients suffering from sepsis/infection

Part C : Patients suffering from haemorrhage

Part D : Patients suffering from shock

Part E : Patients suffering from of vagina or cervix laceration/perforation

Partie F : Patients suffering from uterus laceration/perforation

**PART A : Patients suffering from incomplete abortion**

| N°   | Name of input                                                                                                                                           | Percent of <b>outpatients</b> suffering from incomplete abortion who received this input<br><br>0%=no women<br>100%=all women | Percent of <b>inpatients</b> suffering from incomplete abortion who received this input<br><br>0%=no women<br>100%=all women | Unit<br>( <b>mg</b> =milligram,<br><b>mcg</b> =microgram,<br><b>ml</b> =milliliter<br><b>ui</b> =international unit<br><b>unit</b> =unit, piece...) | Average number of basic units given per <b>outpatient</b> who receives this input | Average number of basic units given per <b>inpatient</b> who receives this input |
|------|---------------------------------------------------------------------------------------------------------------------------------------------------------|-------------------------------------------------------------------------------------------------------------------------------|------------------------------------------------------------------------------------------------------------------------------|-----------------------------------------------------------------------------------------------------------------------------------------------------|-----------------------------------------------------------------------------------|----------------------------------------------------------------------------------|
| (1)  | (2)                                                                                                                                                     | (3)                                                                                                                           | (4)                                                                                                                          | (5)                                                                                                                                                 | (6)                                                                               | (7)                                                                              |
| A1   | Percent of women suffering from incomplete abortion who are treated as outpatients<br>0%=none treated as outpatients<br>100%=All treated as outpatients |                                                                                                                               |                                                                                                                              |                                                                                                                                                     |                                                                                   |                                                                                  |
|      | 1. Antibiotics                                                                                                                                          |                                                                                                                               |                                                                                                                              |                                                                                                                                                     |                                                                                   |                                                                                  |
| A12  | Amoxicillin 500mg                                                                                                                                       |                                                                                                                               |                                                                                                                              | mg                                                                                                                                                  |                                                                                   |                                                                                  |
| A13  | Ampicillin, 1gram, powder for inj                                                                                                                       |                                                                                                                               |                                                                                                                              | mg                                                                                                                                                  |                                                                                   |                                                                                  |
| A14  | Ampicillin, tablets, 500mg                                                                                                                              |                                                                                                                               |                                                                                                                              | mg                                                                                                                                                  |                                                                                   |                                                                                  |
| A15  | Ceftriaxon, 1g, , powder for inj                                                                                                                        |                                                                                                                               |                                                                                                                              | mg                                                                                                                                                  |                                                                                   |                                                                                  |
| A16  | Chloramphenicol, 1g, for injection                                                                                                                      |                                                                                                                               |                                                                                                                              |                                                                                                                                                     |                                                                                   |                                                                                  |
| A17  | Ciprofloxacin, 500mg                                                                                                                                    |                                                                                                                               |                                                                                                                              | mg                                                                                                                                                  |                                                                                   |                                                                                  |
| A18  | Doxycycline 100mg                                                                                                                                       |                                                                                                                               |                                                                                                                              | mg                                                                                                                                                  |                                                                                   |                                                                                  |
| A19  | Gentamycin 80mg/2ml for injection                                                                                                                       |                                                                                                                               |                                                                                                                              | mg                                                                                                                                                  |                                                                                   |                                                                                  |
| A110 | Metronidazole injection 5mg/ml, 100ml                                                                                                                   |                                                                                                                               |                                                                                                                              | mg                                                                                                                                                  |                                                                                   |                                                                                  |
| A111 | Metronidazole 500mg vaginal                                                                                                                             |                                                                                                                               |                                                                                                                              | mg                                                                                                                                                  |                                                                                   |                                                                                  |
|      | 2. Analgesics                                                                                                                                           |                                                                                                                               |                                                                                                                              |                                                                                                                                                     |                                                                                   |                                                                                  |
| A21  | Acetylsalicylic acid, 100mg                                                                                                                             |                                                                                                                               |                                                                                                                              | mg                                                                                                                                                  |                                                                                   |                                                                                  |
| A22  | Diazepam, 10mg/2ml, for injection (valium)                                                                                                              |                                                                                                                               |                                                                                                                              | mg                                                                                                                                                  |                                                                                   |                                                                                  |
| A23  | Diclofenac sodium, 75mg/3ml, for injection                                                                                                              |                                                                                                                               |                                                                                                                              | mg                                                                                                                                                  |                                                                                   |                                                                                  |
| A24  | Diclofenac 100mg, rectal suppository                                                                                                                    |                                                                                                                               |                                                                                                                              | mg                                                                                                                                                  |                                                                                   |                                                                                  |
| A25  | Butilhisocin, 20g/ml, 1ml, for injection                                                                                                                |                                                                                                                               |                                                                                                                              | mg                                                                                                                                                  |                                                                                   |                                                                                  |

**PART A : Patients suffering from incomplete abortion**

|     |                                                                 |  |  |      |  |  |
|-----|-----------------------------------------------------------------|--|--|------|--|--|
| A26 | Ibuprofen 400mg, film coated                                    |  |  | mg   |  |  |
| A27 | Metronidazole 500mg (metamizole)                                |  |  | mg   |  |  |
| A28 | Paracetamol, tablets, 500mg                                     |  |  | mg   |  |  |
| A29 | Pethidine hydrochloride 50mg/ml, 1ml, for injection             |  |  | mg   |  |  |
|     |                                                                 |  |  |      |  |  |
|     | <b>3. Intravenous fluid replacement</b>                         |  |  |      |  |  |
| A31 | Ringer lactate, 1000ml, pvc bag                                 |  |  | ml   |  |  |
| A32 | Glucose isotonic 5%, intravenous solution 500ml, bag/bottle     |  |  | ml   |  |  |
| A33 | Glucose 5% + sodium chloride 0,9% IV, solution 500ml bag/bottle |  |  | ml   |  |  |
| A34 | Sodium chloride 0,9%, 1000ml, bag                               |  |  | ml   |  |  |
|     |                                                                 |  |  |      |  |  |
|     | <b>4. Control of bleeding</b>                                   |  |  |      |  |  |
| A41 | Ergotamine 1mg+caffeine 100mg                                   |  |  | mg   |  |  |
| A42 | Ergometrine maleate 0,2 mg                                      |  |  | mg   |  |  |
| A43 | Oxytocin 10ui/ml, 1ml, for injection                            |  |  | ui   |  |  |
| A44 | Misoprostol 20mg                                                |  |  | mg   |  |  |
| A45 | Dypron, dipyrone 250mg/ml, 2ml, injection                       |  |  | mg   |  |  |
|     |                                                                 |  |  |      |  |  |
|     | <b>5. Lab tests</b>                                             |  |  |      |  |  |
| A51 | Glycemy, PK50                                                   |  |  | unit |  |  |
| A52 | GS/Rh 200tests, 10 ml                                           |  |  | ml   |  |  |
| A53 | Blood lancet, disposable                                        |  |  | unit |  |  |
| A54 | Blood taking set with needle, disposable                        |  |  | unit |  |  |
| A55 | Ethanol 70% denaturated, 1 liter                                |  |  | ml   |  |  |
| A56 | Gauze compresse 5*5cm (per 5 pieces)                            |  |  | unit |  |  |
| A57 | Hemoglobin test                                                 |  |  | unit |  |  |
| A58 | Hepatitis C rapid test                                          |  |  | unit |  |  |

**PARTA : Patients suffering from incomplete abortion**

|      |                                                      |  |  |      |  |  |
|------|------------------------------------------------------|--|--|------|--|--|
| A59  | Seringe 5ml with bypacked needle 21G                 |  |  | unit |  |  |
| A510 | Ultrasound procedure                                 |  |  | unit |  |  |
| A511 | Urine collecting bag 2000ml, with tap and valve      |  |  | unit |  |  |
|      |                                                      |  |  |      |  |  |
|      | <b>6. Operating theater supplies</b>                 |  |  |      |  |  |
| A61  | Seringe 10ml, bypacked needle 21G                    |  |  | ml   |  |  |
| A62  | Seringe 60ml+catheter                                |  |  | ml   |  |  |
| A63  | Gloves examination, latex, large, disposable         |  |  | unit |  |  |
| A64  | Cotton hydrophile, 500g                              |  |  | mg   |  |  |
| A65  | Gauze compresse 5*5cm, 12ply, non sterile            |  |  | unit |  |  |
| A66  | Ehanol 70%, denaturated, 1liter                      |  |  | ml   |  |  |
| A67  | Cetrimide 15% + chlorhexidine gluconate 1,5%, 1liter |  |  | ml   |  |  |
| A68  | Misoprostol, 200mg                                   |  |  | mg   |  |  |
| A69  | Povidone iodine solution, 0.1, 200ml                 |  |  | ml   |  |  |
| A610 | Sanitary pad                                         |  |  | unit |  |  |
|      |                                                      |  |  |      |  |  |
|      | <b>7. Anesthetics/sedatives</b>                      |  |  |      |  |  |
| A71  | Atropine 1mg/ml, 1ml for injection                   |  |  | mg   |  |  |
| A72  | Diazepam, 10mg/2ml, for injection                    |  |  | mg   |  |  |

| <b>PART B : Patients suffering from sepsis/infection</b> |                                                                                                                                                      |                                                                                                                            |                                                                                                                           |                                                                                                                                                     |                                                                                   |                                                                                  |
|----------------------------------------------------------|------------------------------------------------------------------------------------------------------------------------------------------------------|----------------------------------------------------------------------------------------------------------------------------|---------------------------------------------------------------------------------------------------------------------------|-----------------------------------------------------------------------------------------------------------------------------------------------------|-----------------------------------------------------------------------------------|----------------------------------------------------------------------------------|
| N°                                                       | Name of input                                                                                                                                        | Percent of <b>outpatients</b> suffering from sepsis/infection who received this input<br><br>0%=no women<br>100%=all women | Percent of <b>inpatients</b> suffering from sepsis/infection who received this input<br><br>0%=no women<br>100%=all women | Unit<br>( <b>mg</b> =milligram,<br><b>mcg</b> =microgram,<br><b>ml</b> =milliliter<br><b>ui</b> =international unit<br><b>unit</b> =unit, piece...) | Average number of basic units given per <b>outpatient</b> who receives this input | Average number of basic units given per <b>inpatient</b> who receives this input |
| B1                                                       | Percent of women suffering from sepsis/infection who are treated as outpatients<br>0%=none treated as outpatients<br>100%=All treated as outpatients |                                                                                                                            |                                                                                                                           |                                                                                                                                                     |                                                                                   |                                                                                  |
|                                                          | 1. Antibiotics                                                                                                                                       |                                                                                                                            |                                                                                                                           |                                                                                                                                                     |                                                                                   |                                                                                  |
| B12                                                      | Amoxicillin 500mg                                                                                                                                    |                                                                                                                            |                                                                                                                           | mg                                                                                                                                                  |                                                                                   |                                                                                  |
| B13                                                      | Ampicillin, 1gram, powder for inj                                                                                                                    |                                                                                                                            |                                                                                                                           | mg                                                                                                                                                  |                                                                                   |                                                                                  |
| B14                                                      | Ampicillin, tablets, 500mg                                                                                                                           |                                                                                                                            |                                                                                                                           | mg                                                                                                                                                  |                                                                                   |                                                                                  |
| B15                                                      | Ceftriaxon, 1g, , powder for inj                                                                                                                     |                                                                                                                            |                                                                                                                           | mg                                                                                                                                                  |                                                                                   |                                                                                  |
| B16                                                      | Chloramphenicol, 1g, for injection                                                                                                                   |                                                                                                                            |                                                                                                                           | mg                                                                                                                                                  |                                                                                   |                                                                                  |
| B17                                                      | Ciprofloxacin, 500mg                                                                                                                                 |                                                                                                                            |                                                                                                                           | mg                                                                                                                                                  |                                                                                   |                                                                                  |
| B18                                                      | Doxycycline 100mg                                                                                                                                    |                                                                                                                            |                                                                                                                           | mg                                                                                                                                                  |                                                                                   |                                                                                  |
| B19                                                      | Gentamycin 80mg/2ml for injection                                                                                                                    |                                                                                                                            |                                                                                                                           | mg                                                                                                                                                  |                                                                                   |                                                                                  |
| B110                                                     | Metronidazole injection 5mg/ml, 100ml                                                                                                                |                                                                                                                            |                                                                                                                           | mg                                                                                                                                                  |                                                                                   |                                                                                  |
| B111                                                     | Metronidazole 500mg vaginal                                                                                                                          |                                                                                                                            |                                                                                                                           | mg                                                                                                                                                  |                                                                                   |                                                                                  |
|                                                          | 2. Intravenous fluid replacement                                                                                                                     |                                                                                                                            |                                                                                                                           |                                                                                                                                                     |                                                                                   |                                                                                  |
| B21                                                      | Ringer lactate, 1000ml, pvc bag                                                                                                                      |                                                                                                                            |                                                                                                                           | ml                                                                                                                                                  |                                                                                   |                                                                                  |
| B22                                                      | Glucose isotonic 5%, intravenous solution 500ml, bag/bottle                                                                                          |                                                                                                                            |                                                                                                                           | ml                                                                                                                                                  |                                                                                   |                                                                                  |
| B23                                                      | Glucose 5% + sodium chloride 0,9% IV, solution 500ml bag/bottle                                                                                      |                                                                                                                            |                                                                                                                           | ml                                                                                                                                                  |                                                                                   |                                                                                  |
| B24                                                      | Sodium chloride 0,9%, 1000ml, bag                                                                                                                    |                                                                                                                            |                                                                                                                           | ml                                                                                                                                                  |                                                                                   |                                                                                  |
|                                                          | 3. Management of respiration                                                                                                                         |                                                                                                                            |                                                                                                                           |                                                                                                                                                     |                                                                                   |                                                                                  |
| B31                                                      | Oxygen, 100000ml                                                                                                                                     |                                                                                                                            |                                                                                                                           | ml                                                                                                                                                  |                                                                                   |                                                                                  |

**PART B : Patients suffering from sepsis/infection**

| PART B : Patients suffering from sepsis/infection |                                                   |  |  |      |  |
|---------------------------------------------------|---------------------------------------------------|--|--|------|--|
|                                                   | 4. Lab tests                                      |  |  |      |  |
| B41                                               | Glycemy, PK50                                     |  |  | unit |  |
| B42                                               | GS/Rh 200tests, 10 ml                             |  |  | ml   |  |
| B43                                               | Blood lancet, disposable                          |  |  | unit |  |
| B44                                               | Blood taking set with needle, disposable          |  |  | unit |  |
| B45                                               | Ethanol 70% denaturated, 1 liter                  |  |  | ml   |  |
| B46                                               | Gauze compresse 5*5cm (per 5 pieces)              |  |  | unit |  |
| B47                                               | Hemoglobin test                                   |  |  | unit |  |
| B48                                               | Hepatitis C rapid test                            |  |  | unit |  |
| B49                                               | Syringe 5ml with bypacked needle 21G              |  |  | unit |  |
| B410                                              | Ultrasound procedure                              |  |  | unit |  |
| B411                                              | Urine collecting bag 2000ml, with tap and valve   |  |  | unit |  |
|                                                   | 5. Others                                         |  |  |      |  |
| B51                                               | Tetanus vaccine 20 doses (unit)                   |  |  | unit |  |
| B52                                               | Ferrous sulphate 200mg + folic acid 0,25mg        |  |  | mg   |  |
| B53                                               | Dypron, dipyron 250mg/ml, 2ml, injection          |  |  | unit |  |
|                                                   |                                                   |  |  |      |  |
|                                                   | 6. Anesthetics/sedatives                          |  |  |      |  |
| B61                                               | Atropine 1mg/ml, 1ml for injection                |  |  | mg   |  |
| B62                                               | Diazepam, 10mg/2ml, for injection                 |  |  | mg   |  |
| B63                                               | Fentanyl 0,1mg/2ml, for injection                 |  |  | mg   |  |
| B64                                               | Halothane 250ml                                   |  |  | ml   |  |
| B65                                               | Ketamine 50mg/ml, 10ml for injection              |  |  | mg   |  |
| B66                                               | Lidocaine HCl 1%, 20ml for injection              |  |  | ml   |  |
| B67                                               | Lidocaine hydrochloride+ epinephrine              |  |  | ml   |  |
| B68                                               | Lidocaine HCl 5%+dextrose 7,5%, 2ml for injection |  |  | ml   |  |
| B69                                               | Thiopental sodium 1g, powder for injection        |  |  | mg   |  |
| B610                                              | Suxamethonium chloride 100mg/2ml for injection    |  |  | mg   |  |

**PART C : Patients suffering from haemorrhage**

| N°                        | Name of input                                                                                                                                   | Percent of <b>outpatients</b> suffering from haemorrhage who received this input<br><br>0%=no women<br>100%=all women | Percent of <b>inpatients</b> suffering from haemorrhage who received this input<br><br>0%=no women<br>100%=all women | Unit<br>( <b>mg</b> =milligram,<br><b>mcg</b> =microgram,<br><b>ml</b> =milliliter<br><b>ui</b> =international unit<br><b>unit</b> =unit, piece...) | Average number of basic units given per <b>outpatient</b> who receives this input | Average number of basic units given per <b>inpatient</b> who receives this input |
|---------------------------|-------------------------------------------------------------------------------------------------------------------------------------------------|-----------------------------------------------------------------------------------------------------------------------|----------------------------------------------------------------------------------------------------------------------|-----------------------------------------------------------------------------------------------------------------------------------------------------|-----------------------------------------------------------------------------------|----------------------------------------------------------------------------------|
| C1                        | Percent of women suffering from haemorrhage who are treated as outpatients<br>0%=none treated as outpatients<br>100%=All treated as outpatients |                                                                                                                       |                                                                                                                      |                                                                                                                                                     |                                                                                   |                                                                                  |
| 1. Respiration management |                                                                                                                                                 |                                                                                                                       |                                                                                                                      |                                                                                                                                                     |                                                                                   |                                                                                  |
| C1                        | Oxygen, 100000ml                                                                                                                                |                                                                                                                       |                                                                                                                      | ml                                                                                                                                                  |                                                                                   |                                                                                  |
| 2. Control bleeding       |                                                                                                                                                 |                                                                                                                       |                                                                                                                      |                                                                                                                                                     |                                                                                   |                                                                                  |
| C21                       | Ergotamine 1mg+caffeine 100mg                                                                                                                   |                                                                                                                       |                                                                                                                      | mg                                                                                                                                                  |                                                                                   |                                                                                  |
| C22                       | Ergometrine maleate 0,2 mg                                                                                                                      |                                                                                                                       |                                                                                                                      | mg                                                                                                                                                  |                                                                                   |                                                                                  |
| C23                       | Oxytocin 10ui/ml, 1ml, for injection                                                                                                            |                                                                                                                       |                                                                                                                      | ui                                                                                                                                                  |                                                                                   |                                                                                  |
| C24                       | Misoprostol 20mg                                                                                                                                |                                                                                                                       |                                                                                                                      | mg                                                                                                                                                  |                                                                                   |                                                                                  |
| C25                       | Dypron, dipyron 250mg/ml, 2ml, injection                                                                                                        |                                                                                                                       |                                                                                                                      | mg                                                                                                                                                  |                                                                                   |                                                                                  |
| 3. Analgesics             |                                                                                                                                                 |                                                                                                                       |                                                                                                                      |                                                                                                                                                     |                                                                                   |                                                                                  |
| C31                       | Acetylsalicylic acid, 100mg                                                                                                                     |                                                                                                                       |                                                                                                                      | mg                                                                                                                                                  |                                                                                   |                                                                                  |
| C32                       | Diazepam, 10mg/2ml, for injection (valium)                                                                                                      |                                                                                                                       |                                                                                                                      | mg                                                                                                                                                  |                                                                                   |                                                                                  |
| C33                       | Diclofenac sodium, 75mg/3ml, for injection                                                                                                      |                                                                                                                       |                                                                                                                      | mg                                                                                                                                                  |                                                                                   |                                                                                  |
| C34                       | Diclofenac 100mg, rectal suppository                                                                                                            |                                                                                                                       |                                                                                                                      | mg                                                                                                                                                  |                                                                                   |                                                                                  |
| C35                       | Butilhisocin, 20g/ml, 1ml, for injection                                                                                                        |                                                                                                                       |                                                                                                                      | mg                                                                                                                                                  |                                                                                   |                                                                                  |
| C36                       | Ibuprofen 400mg, film coated                                                                                                                    |                                                                                                                       |                                                                                                                      | mg                                                                                                                                                  |                                                                                   |                                                                                  |
| C37                       | Metronidazole 500mg (metamizole)                                                                                                                |                                                                                                                       |                                                                                                                      | mg                                                                                                                                                  |                                                                                   |                                                                                  |
| C38                       | Paracetamol, tablets, 500mg                                                                                                                     |                                                                                                                       |                                                                                                                      | mg                                                                                                                                                  |                                                                                   |                                                                                  |
| C39                       | Pethidine hydrochloride 50mg/ml, 1ml, for injection                                                                                             |                                                                                                                       |                                                                                                                      | mg                                                                                                                                                  |                                                                                   |                                                                                  |

**PART C : Patients suffering from haemorrhage**

| 4. Intravenous fluid replacement |                                                                 |  |  |      |  |
|----------------------------------|-----------------------------------------------------------------|--|--|------|--|
| C41                              | Ringer lactate, 1000ml, pvc bag                                 |  |  | ml   |  |
| C42                              | Glucose isotonic 5%, intravenous solution 500ml, bag/bottle     |  |  | ml   |  |
| C43                              | Glucose 5% + sodium chloride 0,9% IV, solution 500ml bag/bottle |  |  | ml   |  |
| C44                              | Sodium chloride 0,9%, 1000ml, bag                               |  |  | ml   |  |
| C45                              | Polygeline 4%, 500ml (gelofusine, hemacel)                      |  |  | ml   |  |
| C46                              | Dextrose 2,5%+NaCl 0,45%, 1000ml bag                            |  |  | ml   |  |
|                                  |                                                                 |  |  | ml   |  |
| 5. Blood transfusion             |                                                                 |  |  |      |  |
| C51                              | Blood, unit, 500ml                                              |  |  | unit |  |
| C52                              | Ferrous sulphate 200mg + folic acid 0,25mg                      |  |  | mg   |  |
|                                  |                                                                 |  |  |      |  |
| 6. Lab tests                     |                                                                 |  |  |      |  |
| C61                              | Glycemy, PK50                                                   |  |  | unit |  |
| C62                              | GS/Rh 200tests, 10 ml                                           |  |  | ml   |  |
| C63                              | Blood lancet, disposable                                        |  |  | unit |  |
| C64                              | Blood taking set with needle, disposable                        |  |  | unit |  |
| C65                              | Ethanol 70% denaturated, 1 liter                                |  |  | ml   |  |
| C66                              | Gauze compresse 5*5cm (per 5 pieces)                            |  |  | unit |  |
| C67                              | Hemoglobin test                                                 |  |  | unit |  |
| C68                              | Hepatitis C rapid test                                          |  |  | unit |  |
| C69                              | Syringe 5ml with bypacked needle 21G                            |  |  | unit |  |
| C610                             | Ultrasound procedure                                            |  |  | unit |  |
| C611                             | Urine collecting bag 2000ml, with tap and valve                 |  |  | unit |  |
|                                  |                                                                 |  |  |      |  |
|                                  |                                                                 |  |  |      |  |



**PART C : Patients suffering from haemorrhage**

| 7. Anesthetics/sedatives |                                                   |  |  |    |  |
|--------------------------|---------------------------------------------------|--|--|----|--|
| C71                      | Atropine 1mg/ml, 1ml for injection                |  |  | mg |  |
| C72                      | Diazepam, 10mg/2ml, for injection                 |  |  | mg |  |
| C73                      | Fentanyl 0,1mg/2ml, for injection                 |  |  | mg |  |
| C74                      | Halothane 250ml                                   |  |  | ml |  |
| C75                      | Ketamine 50mg/ml, 10ml for injection              |  |  | mg |  |
| C76                      | Lidocaine HCl 1%, 20ml for injection              |  |  | ml |  |
| C77                      | Lidocaine hydrochloride+ epinephrine              |  |  | ml |  |
| C78                      | Lidocaine HCl 5%+dextrose 7,5%, 2ml for injection |  |  | ml |  |
| C79                      | Thiopental sodium 1g, powder for injection        |  |  | mg |  |
| C710                     | Suxamethonium chloride 100mg/2ml for injection    |  |  | mg |  |
|                          |                                                   |  |  |    |  |
|                          |                                                   |  |  |    |  |

**PART D : Patients suffering from shock**

| N°                           | Name of input                                                                                                                             | Percent of <b>outpatients</b> suffering from shock who received this input<br><br>0%=no women<br>100%=all women | Percent of <b>inpatients</b> suffering from shock who received this input<br><br>0%=no women<br>100%=all women | Unit<br>( <b>mg</b> =milligram,<br><b>mcg</b> =microgram,<br><b>ml</b> =milliliter<br><b>ui</b> =international unit<br><b>unit</b> =unit, piece...) | Average number of basic units given per <b>outpatient</b> who receives this input | Average number of basic units given per <b>inpatient</b> who receives this input |
|------------------------------|-------------------------------------------------------------------------------------------------------------------------------------------|-----------------------------------------------------------------------------------------------------------------|----------------------------------------------------------------------------------------------------------------|-----------------------------------------------------------------------------------------------------------------------------------------------------|-----------------------------------------------------------------------------------|----------------------------------------------------------------------------------|
| D1                           | Percent of women suffering from shock who are treated as outpatients<br>0%=none treated as outpatients<br>100%=All treated as outpatients |                                                                                                                 |                                                                                                                |                                                                                                                                                     |                                                                                   |                                                                                  |
| 1. Management of respiration |                                                                                                                                           |                                                                                                                 |                                                                                                                |                                                                                                                                                     |                                                                                   |                                                                                  |
| D11                          | Oxygen, 100000ml                                                                                                                          |                                                                                                                 |                                                                                                                | ml                                                                                                                                                  |                                                                                   |                                                                                  |
| 2. Control of bleeding       |                                                                                                                                           |                                                                                                                 |                                                                                                                |                                                                                                                                                     |                                                                                   |                                                                                  |
| D21                          | Ergotamine 1mg+caffeine 100mg                                                                                                             |                                                                                                                 |                                                                                                                | mg                                                                                                                                                  |                                                                                   |                                                                                  |
| D22                          | Ergometrine maleate 0,2 mg                                                                                                                |                                                                                                                 |                                                                                                                | mg                                                                                                                                                  |                                                                                   |                                                                                  |
| D23                          | Ocytocin 10ui/ml, 1ml, for injection                                                                                                      |                                                                                                                 |                                                                                                                | ui                                                                                                                                                  |                                                                                   |                                                                                  |
| D24                          | Misoprostol 20mg                                                                                                                          |                                                                                                                 |                                                                                                                | mg                                                                                                                                                  |                                                                                   |                                                                                  |
| D25                          | Dypron, dipyron 250mg/ml, 2ml, injection                                                                                                  |                                                                                                                 |                                                                                                                | mg                                                                                                                                                  |                                                                                   |                                                                                  |
| 3. Analgesics                |                                                                                                                                           |                                                                                                                 |                                                                                                                |                                                                                                                                                     |                                                                                   |                                                                                  |
| D31                          | Acetylsalicylic acid, 100mg                                                                                                               |                                                                                                                 |                                                                                                                | mg                                                                                                                                                  |                                                                                   |                                                                                  |
| D32                          | Diazepam, 10mg/2ml, for injection (valium)                                                                                                |                                                                                                                 |                                                                                                                | mg                                                                                                                                                  |                                                                                   |                                                                                  |
| D33                          | Diclofenac sodium, 75mg/3ml, for injection                                                                                                |                                                                                                                 |                                                                                                                | mg                                                                                                                                                  |                                                                                   |                                                                                  |
| D34                          | Diclofenac 100mg, rectal suppository                                                                                                      |                                                                                                                 |                                                                                                                | mg                                                                                                                                                  |                                                                                   |                                                                                  |
| D35                          | Butilhisocin, 20g/ml, 1ml, for injection                                                                                                  |                                                                                                                 |                                                                                                                | mg                                                                                                                                                  |                                                                                   |                                                                                  |
| D36                          | Ibuprofen 400mg, film coated                                                                                                              |                                                                                                                 |                                                                                                                | mg                                                                                                                                                  |                                                                                   |                                                                                  |
| D37                          | Metronidazole 500mg (metamizole)                                                                                                          |                                                                                                                 |                                                                                                                | mg                                                                                                                                                  |                                                                                   |                                                                                  |
| D38                          | Paracetamol, tablets, 500mg                                                                                                               |                                                                                                                 |                                                                                                                | mg                                                                                                                                                  |                                                                                   |                                                                                  |
| D39                          | Pethidine hydrochloride 50mg/ml, 1ml, for inj                                                                                             |                                                                                                                 |                                                                                                                | mg                                                                                                                                                  |                                                                                   |                                                                                  |

**PART D : Patients suffering from shock**

| 4. Intravenous fluid replacement |                                                                 |  |  |      |  |
|----------------------------------|-----------------------------------------------------------------|--|--|------|--|
| D41                              | Ringer lactate, 1000ml, pvc bag                                 |  |  | ml   |  |
| D42                              | Glucose isotonic 5%, intravenous solution 500ml, bag/bottle     |  |  | ml   |  |
| D43                              | Glucose 5% + sodium chloride 0,9% IV, solution 500ml bag/bottle |  |  | ml   |  |
| D44                              | Sodium chloride 0,9%, 1000ml, bag                               |  |  | ml   |  |
| D45                              | Polygeline 4%, 500ml (gelofusine, hemacel)                      |  |  | ml   |  |
| D46                              | Dextrose 2,5%+NaCl 0,45%, 1000ml bag                            |  |  | ml   |  |
|                                  |                                                                 |  |  | ml   |  |
| 5. Blood transfusion             |                                                                 |  |  |      |  |
| D51                              | Blood, unit, 500ml                                              |  |  | unit |  |
| D52                              | Ferrous sulphate 200mg + folic acid 0,25mg                      |  |  | mg   |  |
|                                  |                                                                 |  |  |      |  |
| 6. Lab tests                     |                                                                 |  |  |      |  |
| D61                              | Glycemy, PK50                                                   |  |  | unit |  |
| D62                              | GS/Rh 200tests, 10 ml                                           |  |  | ml   |  |
| D63                              | Blood lancet, disposable                                        |  |  | unit |  |
| D64                              | Blood taking set with needle, disposable                        |  |  | unit |  |
| D65                              | Ethanol 70% denaturated, 1 liter                                |  |  | ml   |  |
| D66                              | Gauze compresse 5*5cm (per 5 pieces)                            |  |  | unit |  |
| D67                              | Hemoglobin test                                                 |  |  | unit |  |
| D68                              | Hepatitis C rapid test                                          |  |  | unit |  |
| D69                              | Syringe 5ml with bypacked needle 21G                            |  |  | unit |  |
| D610                             | Ultrasound procedure                                            |  |  | unit |  |
| D611                             | Urine collecting bag 2000ml, with tap and valve                 |  |  | unit |  |
|                                  |                                                                 |  |  |      |  |
|                                  |                                                                 |  |  |      |  |

**PART D : Patients suffering from shock**

| 7. Anesthetics/sedatives |                                                   |  |  |    |  |
|--------------------------|---------------------------------------------------|--|--|----|--|
| D71                      | Atropine 1mg/ml, 1ml for injection                |  |  | mg |  |
| D72                      | Diazepam, 10mg/2ml, for injection                 |  |  | mg |  |
| D73                      | Fentanyl 0,1mg/2ml, for injection                 |  |  | mg |  |
| D74                      | Halothane 250ml                                   |  |  | ml |  |
| D75                      | Ketamine 50mg/ml, 10ml for injection              |  |  | mg |  |
| D76                      | Lidocaine HCl 1%, 20ml for injection              |  |  | ml |  |
| D77                      | Lidocaine hydrochloride+ epinephrine              |  |  | ml |  |
| D78                      | Lidocaine HCl 5%+dextrose 7,5%, 2ml for injection |  |  | ml |  |
| D79                      | Thiopental sodium 1g, powder for injection        |  |  | mg |  |
| D710                     | Suxamethonium chloride 100mg/2ml for injection    |  |  | mg |  |
|                          |                                                   |  |  |    |  |
|                          |                                                   |  |  |    |  |

**PART E : Patients suffering from cervix/vaginal laceration/perforation**

| N°                              | Name of input                                                                                                                                                             | Percent of <b>outpatients</b> suffering from cervix/vaginal laceration/perforation who received this input<br><br>0%=no women<br>100%=all women | Percent of <b>inpatients</b> suffering from cervix/vaginal laceration/perforation who received this input<br><br>0%=no women<br>100%=all women | Unit<br>( <b>mg</b> =milligram,<br><b>mcg</b> =microgram,<br><b>ml</b> =milliliter<br><b>ui</b> =international unit<br><b>unit</b> =unit, piece...) | Average number of basic units given per <b>outpatient</b> who receives this input | Average number of basic units given per <b>inpatient</b> who receives this input |
|---------------------------------|---------------------------------------------------------------------------------------------------------------------------------------------------------------------------|-------------------------------------------------------------------------------------------------------------------------------------------------|------------------------------------------------------------------------------------------------------------------------------------------------|-----------------------------------------------------------------------------------------------------------------------------------------------------|-----------------------------------------------------------------------------------|----------------------------------------------------------------------------------|
| E1                              | Percent of women suffering from cervix/vaginal laceration/perforation who are treated as outpatients<br>0%=none treated as outpatients<br>100%=All treated as outpatients | %                                                                                                                                               | %                                                                                                                                              |                                                                                                                                                     |                                                                                   |                                                                                  |
| <b>1. Anesthetics/sedatives</b> |                                                                                                                                                                           |                                                                                                                                                 |                                                                                                                                                |                                                                                                                                                     |                                                                                   |                                                                                  |
| E11                             | Atropine 1mg/ml, 1ml for injection                                                                                                                                        |                                                                                                                                                 |                                                                                                                                                | mg                                                                                                                                                  |                                                                                   |                                                                                  |
| E12                             | Diazepam, 10mg/2ml, for injection                                                                                                                                         |                                                                                                                                                 |                                                                                                                                                | mg                                                                                                                                                  |                                                                                   |                                                                                  |
| E13                             | Fentanyl 0,1mg/2ml, for injection                                                                                                                                         |                                                                                                                                                 |                                                                                                                                                | mg                                                                                                                                                  |                                                                                   |                                                                                  |
| E14                             | Halothane 250ml                                                                                                                                                           |                                                                                                                                                 |                                                                                                                                                | ml                                                                                                                                                  |                                                                                   |                                                                                  |
| E15                             | Ketamine 50mg/ml, 10ml for injection                                                                                                                                      |                                                                                                                                                 |                                                                                                                                                | mg                                                                                                                                                  |                                                                                   |                                                                                  |
| E16                             | Lidocaine HCl 1%, 20ml for injection                                                                                                                                      |                                                                                                                                                 |                                                                                                                                                | ml                                                                                                                                                  |                                                                                   |                                                                                  |
| E17                             | Lidocaine hydrochloride+ epinephrine                                                                                                                                      |                                                                                                                                                 |                                                                                                                                                | ml                                                                                                                                                  |                                                                                   |                                                                                  |
| E18                             | Lidocaine HCl 5%+dextrose 7,5%, 2ml for injection                                                                                                                         |                                                                                                                                                 |                                                                                                                                                | ml                                                                                                                                                  |                                                                                   |                                                                                  |
| E19                             | Thiopental sodium 1g. powder for injection                                                                                                                                |                                                                                                                                                 |                                                                                                                                                | mg                                                                                                                                                  |                                                                                   |                                                                                  |
| E110                            | Suxamethonium chloride 100mg/2ml for injection                                                                                                                            |                                                                                                                                                 |                                                                                                                                                | mg                                                                                                                                                  |                                                                                   |                                                                                  |
|                                 |                                                                                                                                                                           |                                                                                                                                                 |                                                                                                                                                |                                                                                                                                                     |                                                                                   |                                                                                  |
| <b>2. Analgesics</b>            |                                                                                                                                                                           |                                                                                                                                                 |                                                                                                                                                |                                                                                                                                                     |                                                                                   |                                                                                  |
| E21                             | Acetylsalicylic acid, 100mg                                                                                                                                               |                                                                                                                                                 |                                                                                                                                                | mg                                                                                                                                                  |                                                                                   |                                                                                  |
| E22                             | Diazepam, 10mg/2ml, for injection (valium)                                                                                                                                |                                                                                                                                                 |                                                                                                                                                | mg                                                                                                                                                  |                                                                                   |                                                                                  |
| E23                             | Diclofenac sodium, 75mg/3ml, for injection                                                                                                                                |                                                                                                                                                 |                                                                                                                                                | mg                                                                                                                                                  |                                                                                   |                                                                                  |
| E24                             | Diclofenac 100mg, rectal suppository                                                                                                                                      |                                                                                                                                                 |                                                                                                                                                | mg                                                                                                                                                  |                                                                                   |                                                                                  |
| E25                             | Butilhisocin, 20g/ml, 1ml, for injection                                                                                                                                  |                                                                                                                                                 |                                                                                                                                                | mg                                                                                                                                                  |                                                                                   |                                                                                  |

**PART E : Patients suffering from cervix/vaginal laceration/perforation**

|      |                                                                 |  |  |      |  |  |
|------|-----------------------------------------------------------------|--|--|------|--|--|
| E26  | Ibuprofen 400mg, film coated                                    |  |  | mg   |  |  |
| E27  | Metronidazole 500mg (metamizole)                                |  |  | mg   |  |  |
| E28  | Paracetamol, tablets, 500mg                                     |  |  | mg   |  |  |
| E29  | Pethidine hydrochloride 50mg/ml, 1ml, for inj                   |  |  | mg   |  |  |
|      |                                                                 |  |  |      |  |  |
|      | <b>3. Intravenous fluid replacement</b>                         |  |  |      |  |  |
| E31  | Ringer lactate, 1000ml, pvc bag                                 |  |  | ml   |  |  |
| E32  | Glucose isotonic 5%, intravenous solution 500ml, bag/bottle     |  |  | ml   |  |  |
| E33  | Glucose 5% + sodium chloride 0,9% IV, solution 500ml bag/bottle |  |  | ml   |  |  |
|      |                                                                 |  |  |      |  |  |
|      | <b>4. Operating theater supplies</b>                            |  |  |      |  |  |
| E41  | Seringe 10ml, with bypacked needle 21G                          |  |  | ml   |  |  |
| E42  | Seringe 60ml+catheter                                           |  |  | ml   |  |  |
| E43  | Gloves examination, latex, large,disposable                     |  |  | unit |  |  |
| E44  | Needle, disposable 21G*1.1/2 (0,8*38mm)                         |  |  | unit |  |  |
| E45  | Needle, disposable 18G*1.1/2 (1,2*38mm)                         |  |  | unit |  |  |
| E46  | Suture silk (0) 75cm with needle 30.0mm                         |  |  | cm   |  |  |
| E47  | Cotton wool, 500g                                               |  |  | mg   |  |  |
| E48  | Gauze compresse 5*5cm, 12ply, non sterile                       |  |  | unit |  |  |
| E49  | Ethanol (alcool) 70%, denaturated, 1liter                       |  |  | ml   |  |  |
| E410 | Povidone iodone solution 0,1 ; 200ml                            |  |  | ml   |  |  |
| E411 | Tetanus vaccine 20doses/ unit                                   |  |  | unit |  |  |
|      |                                                                 |  |  |      |  |  |
|      |                                                                 |  |  |      |  |  |
|      | <b>5. Lab tests</b>                                             |  |  |      |  |  |
| E51  | Glycemy, PK50                                                   |  |  | unit |  |  |
| E52  | GS/Rh 200tests, 10 ml                                           |  |  | ml   |  |  |
| E53  | Blood lancet, disposable                                        |  |  | unit |  |  |
| E54  | Blood taking set with needle, disposable                        |  |  | unit |  |  |
| E55  | Ethanol 70% denaturated, 1 liter                                |  |  | ml   |  |  |
| E56  | Gauze compresse 5*5cm (per 5 pieces)                            |  |  | unit |  |  |

|      |                                                 |  |  |      |  |  |
|------|-------------------------------------------------|--|--|------|--|--|
| E57  | Hemoglobin test                                 |  |  | Unit |  |  |
| E58  | Hepatitis C rapid test                          |  |  | Unit |  |  |
| E59  | Syringe 5ml with bypacked needle 21G            |  |  | Unit |  |  |
| E510 | Ultrasound procedure                            |  |  | Unit |  |  |
| E511 | Urine collecting bag 2000ml, with tap and valve |  |  | Unit |  |  |
|      |                                                 |  |  |      |  |  |
|      | 6. Antibiotics                                  |  |  |      |  |  |
| E61  | Amoxicillin 500mg                               |  |  | mg   |  |  |
| E62  | Ampicillin, 1gram, powder for injection         |  |  | mg   |  |  |
| E63  | Ampicillin, tablets, 500mg                      |  |  | mg   |  |  |
| E64  | Ceftriaxon, 1g, powder for injection            |  |  | mg   |  |  |
| E65  | Chloramphenicol, 1g, injection                  |  |  | mg   |  |  |
| E66  | Ciprofloxacin, 500mg                            |  |  | mg   |  |  |
| E67  | Doxycycline 100mg                               |  |  | mg   |  |  |
| E68  | Gentamycin 80mg/2ml for injection               |  |  | mg   |  |  |
| E69  | Metronidazole injection 5mg/ml, 100ml           |  |  | mg   |  |  |
| E610 | Metronidazole 500mg vaginal                     |  |  | mg   |  |  |
|      |                                                 |  |  |      |  |  |
|      | 7. Others                                       |  |  |      |  |  |
| E71  | Tetanus vaccine 20 doses/ unit                  |  |  | unit |  |  |
| E72  | Ferrous sulphate 200mg + folic acid 0,25mg      |  |  | mg   |  |  |
| E73  | Dypron, Dipyrone 250mg/ml, 2ml, injection       |  |  | mg   |  |  |

**PART F : Patients suffering from uterus laceration/perforation**

| N°                              | Name of input                                                                                                                                                     | Percent of <b>outpatients</b> suffering from uterus laceration/perforation who received this input<br><br>0%=no women<br>100%=all women | Percent of <b>inpatients</b> suffering from uterus laceration/perforation who received this input<br><br>0%=no women<br>100%=all women | Unit<br>( <b>mg</b> =milligram,<br><b>mcg</b> =microgram,<br><b>ml</b> =milliliter<br><b>ui</b> =international unit<br><b>unit</b> =unit, piece...) | Average number of basic units given per <b>outpatient</b> who receives this input | Average number of basic units given per <b>inpatient</b> who receives this input |
|---------------------------------|-------------------------------------------------------------------------------------------------------------------------------------------------------------------|-----------------------------------------------------------------------------------------------------------------------------------------|----------------------------------------------------------------------------------------------------------------------------------------|-----------------------------------------------------------------------------------------------------------------------------------------------------|-----------------------------------------------------------------------------------|----------------------------------------------------------------------------------|
| F1                              | Percent of women suffering from uterus laceration/perforation who are treated as outpatients<br>0%=none treated as outpatients<br>100%=All treated as outpatients | %                                                                                                                                       | %                                                                                                                                      |                                                                                                                                                     |                                                                                   |                                                                                  |
| <b>1. Anesthetics/sedatives</b> |                                                                                                                                                                   |                                                                                                                                         |                                                                                                                                        |                                                                                                                                                     |                                                                                   |                                                                                  |
| F11                             | Atropine 1mg/ml, 1ml for injection                                                                                                                                |                                                                                                                                         |                                                                                                                                        | mg                                                                                                                                                  |                                                                                   |                                                                                  |
| F12                             | Diazepam, 10mg/2ml, for injection                                                                                                                                 |                                                                                                                                         |                                                                                                                                        | mg                                                                                                                                                  |                                                                                   |                                                                                  |
| F13                             | Fentanyl 0,1mg/2ml, for injection                                                                                                                                 |                                                                                                                                         |                                                                                                                                        | mg                                                                                                                                                  |                                                                                   |                                                                                  |
| F14                             | Halothane 250ml                                                                                                                                                   |                                                                                                                                         |                                                                                                                                        | ml                                                                                                                                                  |                                                                                   |                                                                                  |
| F15                             | Ketamine 50mg/ml, 10ml for injection                                                                                                                              |                                                                                                                                         |                                                                                                                                        | mg                                                                                                                                                  |                                                                                   |                                                                                  |
| F16                             | Lidocaine HCl 1%, 20ml for injection                                                                                                                              |                                                                                                                                         |                                                                                                                                        | ml                                                                                                                                                  |                                                                                   |                                                                                  |
| F17                             | Lidocaine hydrochloride+ epinephrine                                                                                                                              |                                                                                                                                         |                                                                                                                                        | ml                                                                                                                                                  |                                                                                   |                                                                                  |
| F18                             | Lidocaine HCl 5%+dextrose 7,5%, 2ml for injection                                                                                                                 |                                                                                                                                         |                                                                                                                                        | ml                                                                                                                                                  |                                                                                   |                                                                                  |
| F19                             | Thiopental sodium 1g. powder for injection                                                                                                                        |                                                                                                                                         |                                                                                                                                        | mg                                                                                                                                                  |                                                                                   |                                                                                  |
| F110                            | Suxamethonium chloride 100mg/2ml for injection                                                                                                                    |                                                                                                                                         |                                                                                                                                        | mg                                                                                                                                                  |                                                                                   |                                                                                  |
| <b>2. Analgesics</b>            |                                                                                                                                                                   |                                                                                                                                         |                                                                                                                                        |                                                                                                                                                     |                                                                                   |                                                                                  |
| F21                             | Acetylsalicylic acid, 100mg                                                                                                                                       |                                                                                                                                         |                                                                                                                                        | mg                                                                                                                                                  |                                                                                   |                                                                                  |
| F22                             | Diazepam, 10mg/2ml, for injection (valium)                                                                                                                        |                                                                                                                                         |                                                                                                                                        | mg                                                                                                                                                  |                                                                                   |                                                                                  |
| F23                             | Diclofenac sodium, 75mg/3ml, for injection                                                                                                                        |                                                                                                                                         |                                                                                                                                        | mg                                                                                                                                                  |                                                                                   |                                                                                  |
| F24                             | Diclofenac 100mg, rectal suppository                                                                                                                              |                                                                                                                                         |                                                                                                                                        | mg                                                                                                                                                  |                                                                                   |                                                                                  |
| F25                             | Butilhisocin, 20g/ml, 1ml, for injection                                                                                                                          |                                                                                                                                         |                                                                                                                                        | mg                                                                                                                                                  |                                                                                   |                                                                                  |



**PART F : Patients suffering from uterus laceration/perforation**

|      |                                                                 |  |  |      |  |  |
|------|-----------------------------------------------------------------|--|--|------|--|--|
| F26  | Ibuprofen 400mg, film coated                                    |  |  | mg   |  |  |
| F27  | Metronidazole 500mg (metamizole)                                |  |  | mg   |  |  |
| F28  | Paracetamol, tablets, 500mg                                     |  |  | mg   |  |  |
| F29  | Pethidine hydrochloride 50mg/ml, 1ml, for inj                   |  |  | mg   |  |  |
|      |                                                                 |  |  |      |  |  |
|      | <b>3. Intravenous fluid replacement</b>                         |  |  |      |  |  |
| F31  | Ringer lactate, 1000ml, pvc bag                                 |  |  | ml   |  |  |
| F32  | Glucose isotonic 5%, intravenous solution 500ml, bag/bottle     |  |  | ml   |  |  |
| F33  | Glucose 5% + sodium chloride 0,9% IV, solution 500ml bag/bottle |  |  | ml   |  |  |
| F34  | Polygeline 4%, 500ml (gelofusine)                               |  |  | ml   |  |  |
| F35  | Sodium chloride 0,9%, 1000ml bag                                |  |  | ml   |  |  |
|      |                                                                 |  |  |      |  |  |
|      | <b>4. Operating theater supplies</b>                            |  |  |      |  |  |
| F41  | Seringe 10ml, with needle 21G*1,5 inch                          |  |  | ml   |  |  |
| F42  | Seringe 60ml+catheter, disposable                               |  |  | ml   |  |  |
| F43  | Gloves examination, latex, large,disposable                     |  |  | unit |  |  |
| F44  | Needle, disposable 21G*1.1/2 (0,8*38mm)                         |  |  | unit |  |  |
| F45  | Needle, disposable 18G*1.1/2 (1,2*38mm)                         |  |  | unit |  |  |
| F46  | Suture silk (0) 75cm with needle 30.0mm                         |  |  | cm   |  |  |
| F47  | Cotton, 500g                                                    |  |  | mg   |  |  |
| F48  | Suture silk vicryl (3/0) 2*70cm                                 |  |  | unit |  |  |
| F49  | Suture silk vicryl (3/0), 70cm, 17,5mm                          |  |  | cm   |  |  |
| F410 | Suture needles assorted sizes                                   |  |  | unit |  |  |
| F411 | Gauze compresse 5*5cm, 12ply, non sterile                       |  |  | unit |  |  |
| F412 | Ethanol (alcool) 70%, denaturated, 1liter                       |  |  | ml   |  |  |
| F413 | Povidone iodine solution 0,1 ; 200ml                            |  |  | ml   |  |  |
| F414 | Epinephrine (adrenaline) 1mg/ml, 1ml, injection                 |  |  | mg   |  |  |
| F415 | Water for injection, 10ml                                       |  |  | ml   |  |  |
| F416 | Blood, ( one unit=500ml)                                        |  |  | unit |  |  |
| F417 | Oxygen                                                          |  |  | ml   |  |  |
| F418 | Tetanus vaccine 20 doses ( unit)                                |  |  | unit |  |  |

**PART F : Patients suffering from uterus laceration/perforation**

|                                   |                                                   |  |  |      |  |  |
|-----------------------------------|---------------------------------------------------|--|--|------|--|--|
| F419                              | Cetrimide 15% + chlorhexidine gluconate 1,5%, 1l  |  |  | ml   |  |  |
| <b>5. Supplies for laparotomy</b> |                                                   |  |  |      |  |  |
| F51                               | Gloves examination, latex, large, disposable      |  |  | Unit |  |  |
| F52                               | Sanitary pad                                      |  |  | unit |  |  |
| F53                               | Gauze compresses 100cm, 12 ply, sterile per piece |  |  | cm   |  |  |
| F54                               | Cotton swab                                       |  |  | Unit |  |  |
| F55                               | Suture silk 75cm with needle 30mm                 |  |  | Unit |  |  |
| F56                               | Drapes in strong cotton 1,5m <sup>2</sup>         |  |  | unit |  |  |
| <b>6. Lab tests</b>               |                                                   |  |  |      |  |  |
| F61                               | Glycémie, PK50                                    |  |  | Unit |  |  |
| F62                               | GS/Rh 200tests, 10 ml                             |  |  | ml   |  |  |
| F63                               | Blood lancet, disposable                          |  |  | Unit |  |  |
| F64                               | Blood taking set with needle, disposable          |  |  | Unit |  |  |
| F65                               | Ethanol 70% denaturated, 1 liter                  |  |  | ml   |  |  |
| F66                               | Gauze compresse 5*5cm (per 5 pieces)              |  |  | Unit |  |  |
| F67                               | Hemoglobin test                                   |  |  | Unit |  |  |
| F68                               | Hepatitis C rapid test                            |  |  | Unit |  |  |
| F69                               | Syringe 5ml with bypacked needle 21G              |  |  | Unit |  |  |
| F610                              | Ultrasound procedure                              |  |  | unit |  |  |
| F611                              | Urine collecting bag 2000ml, with tap and valve   |  |  | unit |  |  |
| <b>7. Antibiotics</b>             |                                                   |  |  |      |  |  |
| E61                               | Amoxicillin 500mg                                 |  |  | mg   |  |  |
| E62                               | Ampicillin, 1gram, powder for injection           |  |  | mg   |  |  |
| E63                               | Ampicillin, tablets, 500mg                        |  |  | mg   |  |  |
| E64                               | Ceftriaxon, 1g, powder for injection              |  |  | mg   |  |  |

|      |                                            |  |  |      |  |  |
|------|--------------------------------------------|--|--|------|--|--|
| E65  | Chloramphenicol, 1g, injection             |  |  | mg   |  |  |
| E66  | Ciprofloxacin, 500mg                       |  |  | mg   |  |  |
| E67  | Doxycycline 100mg                          |  |  | mg   |  |  |
| E68  | Gentamycine 80mg/2ml for injection         |  |  | mg   |  |  |
| E69  | Metronidazole injection 5mg/ml, 100ml      |  |  | mg   |  |  |
| E610 | Metronidazole 500mg vaginal                |  |  | mg   |  |  |
|      |                                            |  |  |      |  |  |
|      | 8. Others                                  |  |  |      |  |  |
| E71  | Tetanus vaccine 20 doses/ unit             |  |  | unit |  |  |
| E72  | Ferrous sulphate 200mg + folic acid 0,25mg |  |  | mg   |  |  |
| E73  | Dypron, Dipyrone 250mg/ml, 2ml, injection  |  |  | mg   |  |  |
